# Supplementary material
Source: PubMed Central journal article supplement (PMC3731909)
Supplement: CJN.10721012_CJN10721012SupplementaryData.pdf [file CJN.10721012_CJN10721012SupplementaryData.pdf]

**Web Figure. Examples of determining index date for sustained eGFR <15 mL/min cohort**

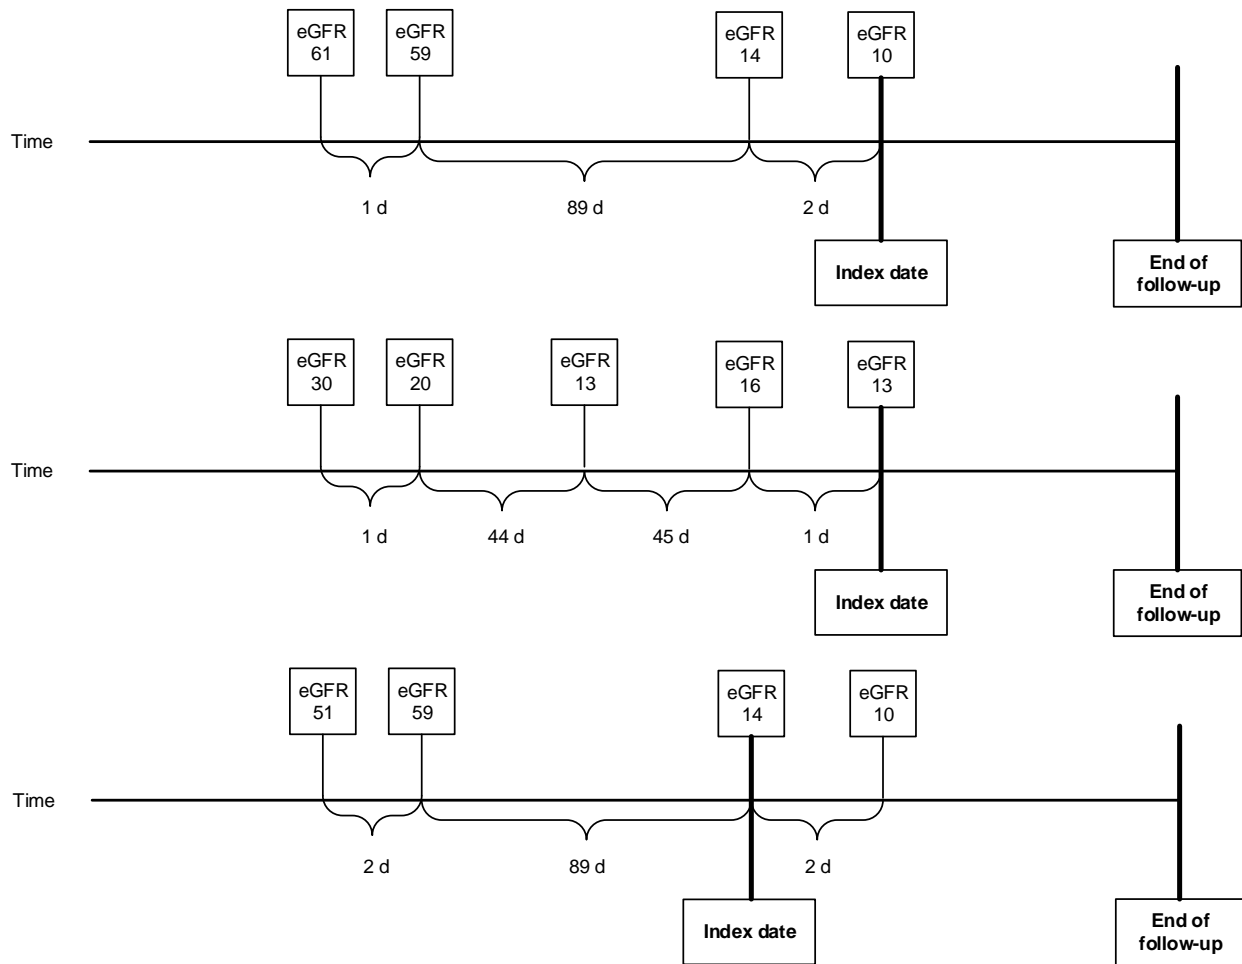

The Figure shows how the different components of the inclusion criteria relate to one another – and in particular, how the requirement for confirmed CKD (two measurements of eGFR <60 ml/min/1.73m<sup>2</sup> within a 90d period) relates to the requirement for sustained eGFR <15 ml/min/1.73m<sup>2</sup>.

For example, the patient in the first row is not classified as having CKD until the measurement of eGFR=10 ml/min/1.73m<sup>2</sup> (because the measurements of 59 and 14 ml/min/1.73m<sup>2</sup> have occurred within a period of <90d). Since patients must be confirmed with CKD as well as having eGFR < 15 ml/min/1.73m<sup>2</sup> to be included in the study, this patient is not eligible until the measurement of 10 ml/min/1.73m<sup>2</sup> is recorded – and therefore, this date is used as the index date.

eGFR glomerular filtration rate estimated using the Chronic Kidney Disease Epidemiology Collaboration equation

**Web Table. Percent initiating chronic RRT by important factors**

| Age     | Heavy/severe proteinuria | Dementia | Metastatic cancer | Distance, km | Sex    | In first year | Over full follow-up |
|---------|--------------------------|----------|-------------------|--------------|--------|---------------|---------------------|
| ≥70     | N                        | Y        | Y                 | >200         | Female | 0.9           | 3.2                 |
| ≥70     | N                        | Y        | Y                 | ≤50          | Female | 1.3           | 4.5                 |
| ≥70     | N                        | Y        | N                 | >200         | Female | 1.5           | 5.2                 |
| ≥70     | N                        | Y        | Y                 | >200         | Male   | 2.0           | 6.7                 |
| ≥70     | N                        | Y        | N                 | ≤50          | Female | 2.2           | 7.4                 |
| ≥70     | N                        | N        | Y                 | >200         | Female | 2.5           | 8.6                 |
| ≥70     | Y                        | Y        | Y                 | >200         | Female | 2.8           | 9.3                 |
| 50-69.9 | N                        | Y        | Y                 | >200         | Female | 2.8           | 9.4                 |
| ≥70     | N                        | Y        | Y                 | ≤50          | Male   | 2.8           | 9.5                 |
| ≥70     | N                        | Y        | N                 | >200         | Male   | 3.2           | 10.8                |
| 50-69.9 | N                        | Y        | Y                 | >200         | Male   | 3.3           | 11.2                |
| ≥70     | N                        | N        | Y                 | ≤50          | Female | 3.6           | 12.2                |
| ≥70     | Y                        | Y        | Y                 | ≤50          | Female | 4.0           | 13.2                |
| 50-69.9 | N                        | Y        | Y                 | ≤50          | Female | 4.0           | 13.2                |
| ≥70     | N                        | N        | N                 | >200         | Female | 4.2           | 13.9                |
| <50     | N                        | Y        | Y                 | >200         | Female | 4.3           | 14.2                |
| ≥70     | Y                        | Y        | N                 | >200         | Female | 4.5           | 15.0                |
| 50-69.9 | N                        | Y        | N                 | >200         | Female | 4.6           | 15.0                |
| ≥70     | N                        | Y        | N                 | ≤50          | Male   | 4.6           | 15.2                |
| 50-69.9 | N                        | Y        | Y                 | ≤50          | Male   | 4.8           | 15.7                |
| ≥70     | N                        | N        | Y                 | >200         | Male   | 5.4           | 17.7                |
| 50-69.9 | N                        | Y        | N                 | >200         | Male   | 5.5           | 17.9                |
| ≥70     | Y                        | Y        | Y                 | >200         | Male   | 5.9           | 19.1                |
| <50     | N                        | Y        | Y                 | >200         | Male   | 6.0           | 19.5                |
| ≥70     | N                        | N        | N                 | ≤50          | Female | 6.0           | 19.4                |
| <50     | N                        | Y        | Y                 | ≤50          | Female | 6.1           | 19.8                |
| ≥70     | Y                        | Y        | N                 | ≤50          | Female | 6.5           | 20.9                |
| 50-69.9 | N                        | Y        | N                 | ≤50          | Female | 6.5           | 20.9                |
| <50     | N                        | Y        | N                 | >200         | Female | 7.0           | 22.4                |
| ≥70     | Y                        | N        | Y                 | >200         | Female | 7.6           | 24.2                |
| 50-69.9 | N                        | N        | Y                 | >200         | Female | 7.6           | 24.2                |
| ≥70     | N                        | N        | Y                 | ≤50          | Male   | 7.7           | 24.5                |
| 50-69.9 | N                        | Y        | N                 | ≤50          | Male   | 7.8           | 24.7                |
| 50-69.9 | Y                        | Y        | Y                 | >200         | Female | 8.2           | 39.3                |
| ≥70     | Y                        | Y        | Y                 | ≤50          | Male   | 8.3           | 26.3                |
| <50     | N                        | Y        | Y                 | ≤50          | Male   | 8.5           | 26.8                |

| Age     | Heavy/severe proteinuria | Dementia | Metastatic cancer | Distance, km | Sex    | In first year | Over full follow-up |
|---------|--------------------------|----------|-------------------|--------------|--------|---------------|---------------------|
| ≥70     | N                        | N        | N                 | >200         | Male   | 8.8           | 27.6                |
| 50-69.9 | N                        | N        | Y                 | >200         | Male   | 9.2           | 28.4                |
| ≥70     | Y                        | Y        | N                 | >200         | Male   | 9.5           | 29.6                |
| <50     | N                        | Y        | N                 | >200         | Male   | 9.8           | 30.2                |
| 50-69.9 | Y                        | Y        | Y                 | >200         | Male   | 9.9           | 30.4                |
| <50     | N                        | Y        | N                 | ≤50          | Female | 9.9           | 30.6                |
| ≥70     | Y                        | N        | Y                 | ≤50          | Female | 10.8          | 32.8                |
| 50-69.9 | N                        | N        | Y                 | ≤50          | Female | 10.8          | 32.9                |
| <50     | N                        | N        | Y                 | >200         | Female | 11.6          | 35.0                |
| 50-69.9 | Y                        | Y        | Y                 | ≤50          | Female | 11.6          | 35.2                |
| ≥70     | Y                        | N        | N                 | >200         | Female | 12.3          | 36.8                |
| 50-69.9 | N                        | N        | N                 | >200         | Female | 12.3          | 36.8                |
| ≥70     | N                        | N        | N                 | ≤50          | Male   | 12.4          | 37.2                |
| <50     | Y                        | Y        | Y                 | >200         | Female | 12.5          | 37.4                |
| 50-69.9 | N                        | N        | Y                 | ≤50          | Male   | 12.8          | 38.2                |
| 50-69.9 | Y                        | Y        | N                 | >200         | Female | 13.3          | 26.0                |
| ≥70     | Y                        | Y        | N                 | ≤50          | Male   | 13.5          | 39.7                |
| <50     | N                        | Y        | N                 | ≤50          | Male   | 13.8          | 40.5                |
| 50-69.9 | Y                        | Y        | Y                 | ≤50          | Male   | 13.9          | 40.7                |
| 50-69.9 | N                        | N        | N                 | >200         | Male   | 14.6          | 42.5                |
| ≥70     | Y                        | N        | Y                 | >200         | Male   | 15.7          | 44.9                |
| 50-69.9 | Y                        | Y        | N                 | >200         | Male   | 15.8          | 45.2                |
| <50     | N                        | N        | Y                 | >200         | Male   | 16.0          | 45.7                |
| <50     | N                        | N        | Y                 | ≤50          | Female | 16.2          | 46.2                |
| ≥70     | Y                        | N        | N                 | ≤50          | Female | 17.2          | 48.3                |
| 50-69.9 | N                        | N        | N                 | ≤50          | Female | 17.2          | 48.4                |
| <50     | Y                        | Y        | Y                 | >200         | Male   | 17.3          | 48.6                |
| <50     | Y                        | Y        | Y                 | ≤50          | Female | 17.5          | 49.1                |
| <50     | N                        | N        | N                 | >200         | Female | 18.5          | 51.1                |
| 50-69.9 | Y                        | Y        | N                 | ≤50          | Female | 18.6          | 51.3                |
| <50     | Y                        | Y        | N                 | >200         | Female | 19.9          | 54.0                |
| 50-69.9 | N                        | N        | N                 | ≤50          | Male   | 20.4          | 55.0                |
| 50-69.9 | Y                        | N        | Y                 | >200         | Female | 21.5          | 57.2                |
| ≥70     | Y                        | N        | Y                 | ≤50          | Male   | 21.8          | 57.6                |
| 50-69.9 | Y                        | Y        | N                 | ≤50          | Male   | 22.0          | 58.0                |
| <50     | N                        | N        | Y                 | ≤50          | Male   | 22.2          | 58.5                |
| <50     | Y                        | Y        | Y                 | ≤50          | Male   | 23.9          | 61.6                |

| Age     | Heavy/severe proteinuria | Dementia | Metastatic cancer | Distance, km | Sex    | In first year | Over full follow-up |
|---------|--------------------------|----------|-------------------|--------------|--------|---------------|---------------------|
| ≥70     | Y                        | N        | N                 | >200         | Male   | 24.6          | 62.8                |
| <50     | N                        | N        | N                 | >200         | Male   | 25.2          | 63.7                |
| <50     | N                        | N        | N                 | ≤50          | Female | 25.5          | 64.3                |
| 50-69.9 | Y                        | N        | Y                 | >200         | Male   | 25.6          | 64.0                |
| <50     | Y                        | Y        | N                 | >200         | Male   | 27.0          | 66.8                |
| <50     | Y                        | Y        | N                 | ≤50          | Female | 27.4          | 67.3                |
| 50-69.9 | Y                        | N        | Y                 | ≤50          | Female | 29.5          | 70.5                |
| <50     | Y                        | N        | Y                 | >200         | Female | 31.4          | 73.3                |
| 50-69.9 | Y                        | N        | N                 | >200         | Female | 33.1          | 75.5                |
| ≥70     | Y                        | N        | N                 | ≤50          | Male   | 33.4          | 75.9                |
| <50     | N                        | N        | N                 | ≤50          | Male   | 34.1          | 76.8                |
| 50-69.9 | Y                        | N        | Y                 | ≤50          | Male   | 34.3          | 77.1                |
| <50     | Y                        | Y        | N                 | ≤50          | Male   | 36.5          | 79.6                |
| 50-69.9 | Y                        | N        | N                 | >200         | Male   | 38.4          | 81.7                |
| <50     | Y                        | N        | Y                 | >200         | Male   | 41.4          | 84.6                |
| <50     | Y                        | N        | Y                 | ≤50          | Female | 41.9          | 85.0                |
| 50-69.9 | Y                        | N        | N                 | ≤50          | Female | 43.9          | 86.8                |
| <50     | Y                        | N        | N                 | >200         | Female | 46.5          | 88.8                |
| 50-69.9 | Y                        | N        | N                 | ≤50          | Male   | 50.2          | 91.3                |
| <50     | Y                        | N        | Y                 | ≤50          | Male   | 53.7          | 93.3                |
| <50     | Y                        | N        | N                 | >200         | Male   | 58.8          | 95.5                |
| <50     | Y                        | N        | N                 | ≤50          | Female | 59.4          | 95.7                |
| <50     | Y                        | N        | N                 | ≤50          | Male   | 72.2          | 98.9                |

The table is shaded to illustrate the likelihood of initiating RRT (darker shading represents a lower likelihood).

RRT renal replacement therapy, CVD cerebrovascular disease, COPD chronic obstructive pulmonary disease, CHF congestive heart failure, MI myocardial infarction, PUD peptic ulcer disease PVD peripheral vascular disease

Adjusted for a population with the following characteristics: 3.3% Aboriginal, 4.6% income support, 15.4% rural, 47.6% diabetes, 90.3% hypertension, 19.6% non-metastatic cancer, 17.3% CVD, 34.0% COPD, 44.1% CHF, 3.2% mild liver disease, 1.2% moderate/severe liver disease, 22.0% MI, 2.5% paraplegia, 7.7% PUD, 15.6% PVD, 4.8% rheumatoid disease, 21.6% affective disorder, 4.4% psychotic disorder.
